# Supplementary material
Source: HighWire-hosted journal article supplement (https://www.cmaj.ca/highwire/filestream/69455/field_highwire_adjunct_files/2/170880-res-3-at.pdf)
Supplement: 170880-res-3-at.pdf [file 170880-res-3-at.pdf]

**Appendix 3 (as supplied by the authors):** Determination of household food insecurity status based on the Household Food Security Survey Module<sup>1</sup>

| Status                        | Interpretation                                                                                                    | 10 item adult food security scale            | 8 item child food security scale |
|-------------------------------|-------------------------------------------------------------------------------------------------------------------|----------------------------------------------|----------------------------------|
| <b>Food secure</b>            | No report of income-related problems of food access.                                                              | No items affirmed                            | No items affirmed                |
| <b>Marginal food insecure</b> | Some indication of worry or an income-related barrier to adequate, secure food access.                            | Affirmed no more than 1 item on either scale |                                  |
| <b>Moderate food insecure</b> | Compromise in quality and/or quantity of food consumed by adults and/or children due to a lack of money for food. | 2 to 5 Positive responses                    | 2 to 4 Positive responses        |
| <b>Severe food insecure</b>   | Disrupted eating patterns and reduced food intake among adults and/or children                                    | 6 or More positive responses                 | 5 or More positive responses     |

<sup>1</sup>Adapted from: Canadian Community Health Survey, Cycle 2.2, Nutrition (2004): Income related Household Food Security in Canada.
